# Supplementary material
Source: Springer Nature journal article supplement (https://www.springermedizin.de/resource/supplementary/12889_2014_7177_MOESM3_ESM.pdf/9496954)
Supplement: MOESM3 [file 9496954]

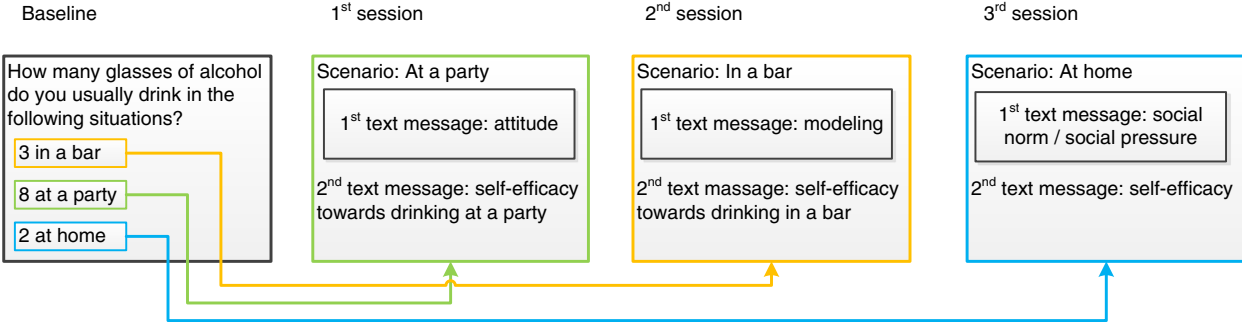

*This figure illustrates how the game scenario and second text message is influenced by the answers given in the baseline questionnaire. Colored lines indicate a flexible sequence, black boxes are fixed.*
